# Supplementary material for: Evaluation of a digital remote extraction analysis and monitoring tool for key performance indicators (KPIs) in the blood culture process
Source: Eur J Clin Microbiol Infect Dis. 2025 Aug 18;44(11):2761–70. doi: 10.1007/s10096-025-05238-x (PMC12619790; doi:10.1007/s10096-025-05238-x)
Supplement: Supplementary file 1 — Supplementary Table 1. Minumum and maximum KPI 1, 2 and 3 values stratified per center and per area. (10.1 KB) [file 10096_2025_5238_MOESM1_ESM.xlsx]

## Sheet: Mean Bottle
	Mean mL blood volume/BC bottle (min – max)	Mean mL blood volume/episode (min – max)	Mean n. bottles/episode (min - max)
Center
Center 1	3,8 - 10,9	25,1 - 71,67	3,73 - 7,80
Center 2	2,6 - 10,5	9,35 - 46,58	1,98 - 5,42
Center 3	2,6 - 12,7	13,57 - 59,41	3,24 - 6,67
Center 4	2,3 - 13,1	10,09 - 77,44	2,68 - 7,52
Center 5	3,9 - 11,3	15,95 - 48,11	2,66 - 6,05
Center 6	4,4 - 10,7	9,34 - 37,28	1,60 - 4,33
Center 7	4,2 - 10,2	17,18 - 46,66	2,84 - 7,09
Total	2,3 - 13,1	9,34 - 77,44	1,60 - 7,80
Area
Surgical	4,2 - 12,4	16,47 - 57,69	1,98 - 6,32
Emergency	5,1 - 8,4	17,25 - 30,71	2,31 - 4,36
Medical	2,3 - 13,1	9,34 - 71,67	2,09 - 7,8
Traumatology	4,8 - 10,7	17,64 - 43,64	2,68 - 5,97
ICU	4,7 - 10,9	13,47 - 77,44	1,6 - 7,52
Total	2,3 - 13,1	9,34 - 77,44	1,6 - 7,8
